# Supplementary material for: N-Terminal Fatty Acids of NEFMUT Are Required for the CD8+ T-Cell Immunogenicity of In Vivo Engineered Extracellular Vesicles
Source: MDPI journal article supplement (doi:10.3390/vaccines8020243), 2020-05-22
Supplement: s1 [file s1]

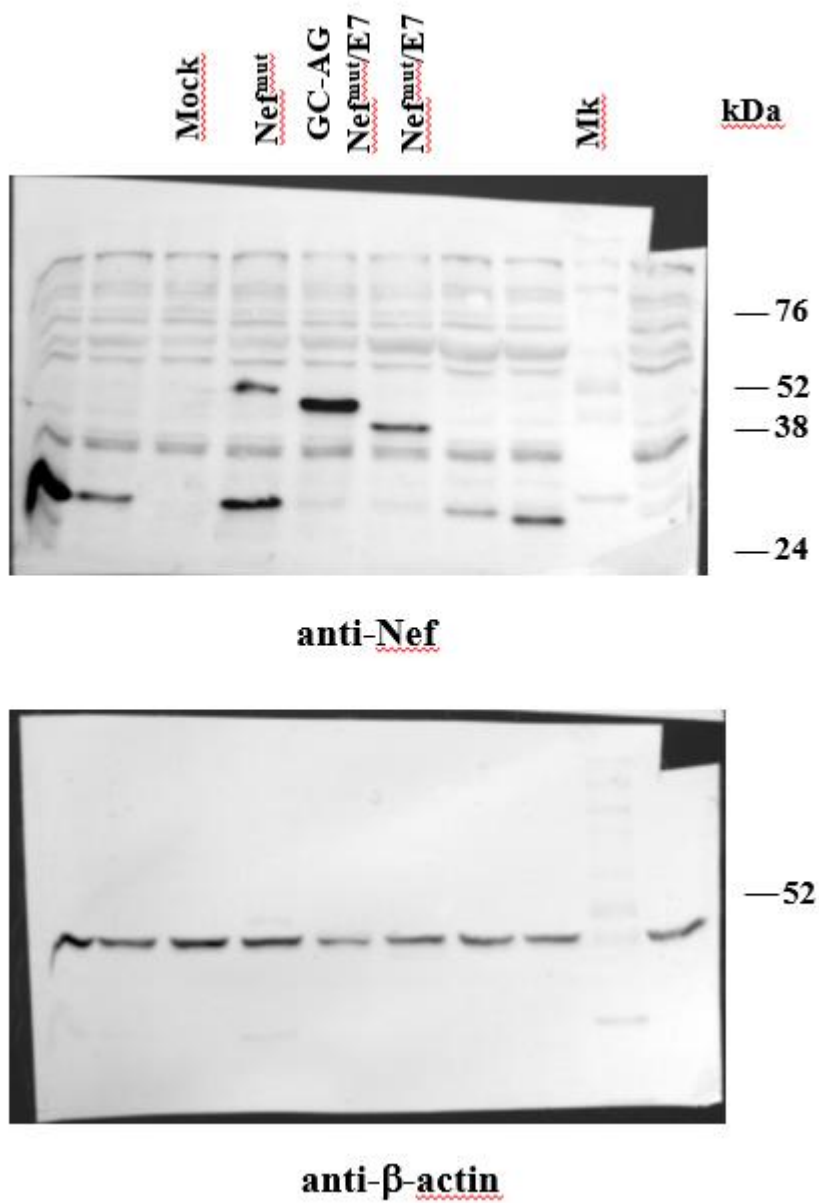

**Figure S1.** Uncropped blots showing all the bands with all molecular weight of Figure 3— Analysis of expression of GC-AG Nef<sup>mut</sup>/E7. Western blot analysis of total cell lysates from HEK-293T cells transfected with DNA vectors expressing the indicated Nef<sup>mut</sup>-based fusion products.
